# Supplementary material
Source: PubMed Central journal article supplement (PMC6986425)
Supplement: NIHMS1542653-supplement-1.pdf [file NIHMS1542653-supplement-1.pdf]

**Supplementary Table S1:** Characteristics of Hepatocellular Carcinoma Cases by Race/Ethnicity, California, 1988-2014

|                    | Non-Hispanic White<br>N=19,246 |       | Non-Hispanic Black<br>N=3,773 |       | Hispanic<br>N=12,608 |       | Chinese<br>N=3,688 |       | Filipino<br>N=2,008 |       | Japanese<br>N=871 |       | Korean<br>N=1,470 |       | South Asian<br>N=296 |       | Vietnamese<br>N=2,788 |       |
|--------------------|--------------------------------|-------|-------------------------------|-------|----------------------|-------|--------------------|-------|---------------------|-------|-------------------|-------|-------------------|-------|----------------------|-------|-----------------------|-------|
|                    | N                              | %     | N                             | %     | N                    | %     | N                  | %     | N                   | %     | N                 | %     | N                 | %     | N                    | %     | N                     | %     |
| Sex                |                                |       |                               |       |                      |       |                    |       |                     |       |                   |       |                   |       |                      |       |                       |       |
| Male               | 14,719                         | 76.5% | 2,858                         | 75.7% | 9,275                | 73.6% | 2,763              | 74.9% | 1,469               | 73.2% | 382               | 43.9% | 1,012             | 68.8% | 216                  | 73.0% | 2,163                 | 77.6% |
| Female             | 4,527                          | 23.5% | 915                           | 24.3% | 3,333                | 26.4% | 925                | 25.1% | 539                 | 26.8% | 489               | 56.1% | 458               | 31.2% | 80                   | 27.0% | 625                   | 22.4% |
| Age at diagnosis   |                                |       |                               |       |                      |       |                    |       |                     |       |                   |       |                   |       |                      |       |                       |       |
| <40                | 295                            | 1.5%  | 78                            | 2.1%  | 244                  | 1.9%  | 155                | 4.2%  | 71                  | 3.5%  | <5                | 0.2%  | 37                | 2.5%  | 6                    | 2.0%  | 114                   | 4.1%  |
| 40-49              | 1,261                          | 6.6%  | 319                           | 8.5%  | 1,297                | 10.3% | 347                | 9.4%  | 181                 | 9.0%  | 30                | 3.4%  | 170               | 11.6% | 13                   | 4.4%  | 265                   | 9.5%  |
| 50-59              | 5,119                          | 26.6% | 1,241                         | 32.9% | 3,729                | 29.6% | 711                | 19.3% | 391                 | 19.5% | 133               | 15.3% | 366               | 24.9% | 68                   | 23.0% | 698                   | 25.0% |
| 60-69              | 5,701                          | 29.6% | 1,316                         | 34.9% | 3,662                | 29.0% | 1,016              | 27.5% | 496                 | 24.7% | 278               | 31.9% | 446               | 30.3% | 98                   | 33.1% | 819                   | 29.4% |
| 70-79              | 4,495                          | 23.4% | 604                           | 16.0% | 2,602                | 20.6% | 986                | 26.7% | 557                 | 27.7% | 277               | 31.8% | 333               | 22.7% | 75                   | 25.3% | 665                   | 23.9% |
| ≥80                | 2,375                          | 12.3% | 215                           | 5.7%  | 1,074                | 8.5%  | 473                | 12.8% | 312                 | 15.5% | 151               | 17.3% | 118               | 8.0%  | 36                   | 12.2% | 227                   | 8.1%  |
| Stage at diagnosis |                                |       |                               |       |                      |       |                    |       |                     |       |                   |       |                   |       |                      |       |                       |       |
| Localized          | 8,125                          | 42.2% | 1,448                         | 38.4% | 5,625                | 44.6% | 1,579              | 42.8% | 828                 | 41.2% | 377               | 43.3% | 589               | 40.1% | 128                  | 43.2% | 1,299                 | 46.6% |
| Regional           | 4309                           | 22.4% | 921                           | 24.4% | 2,897                | 23.0% | 765                | 20.7% | 496                 | 24.7% | 187               | 21.5% | 324               | 22.0% | 72                   | 24.3% | 624                   | 22.4% |
| Distant            | 3920                           | 20.4% | 881                           | 23.4% | 2,301                | 18.3% | 757                | 20.5% | 451                 | 22.5% | 180               | 20.7% | 281               | 19.1% | 62                   | 20.9% | 524                   | 18.8% |
| Unspecified        | 2,892                          | 15.0% | 523                           | 13.9% | 1,785                | 14.2% | 587                | 15.9% | 233                 | 11.6% | 127               | 14.6% | 276               | 18.8% | 34                   | 11.5% | 341                   | 12.2% |
