# Supplementary material
Source: PubMed Central journal article supplement (PMC6986425)
Supplement: NIHMS1542653-supplement-2.pdf [file NIHMS1542653-supplement-2.pdf]

**Supplementary Table S2: Characteristics of Hispanic and Asian Hepatocellular Carcinoma Cases by Nativity, California, 1988-2014**

|                    | Hispanic<br>N=12,608 |       | Chinese<br>N=3,688 |       | Filipino<br>N=2,008 |       | Japanese<br>N=871 |       | Korean<br>N=1,470 |       | South<br>Asian<br>N=296 |       | Vietnamese<br>N=2,788 |       |
|--------------------|----------------------|-------|--------------------|-------|---------------------|-------|-------------------|-------|-------------------|-------|-------------------------|-------|-----------------------|-------|
|                    | N                    | %     | N                  | %     | N                   | %     | N                 | %     | N                 | %     | N                       | %     | N                     | %     |
| U.S.-born          | 6791                 |       | 283                |       | 133                 |       | 319               |       | 34                |       | 19                      |       | 50                    |       |
| Sex                |                      |       |                    |       |                     |       |                   |       |                   |       |                         |       |                       |       |
| Male               | 5361                 | 78.9% | 213                | 75.3% | 100                 | 75.2% | 224               | 70.2% | 26                | 76.5% | 14                      | 82.4% | 42                    | 84.0% |
| Female             | 1430                 | 21.1% | 70                 | 24.7% | 33                  | 24.8% | 95                | 29.8% | 8                 | 23.5% | <5                      | 17.6% | 8                     | 16.0% |
| Age at diagnosis   |                      |       |                    |       |                     |       |                   |       |                   |       |                         |       |                       |       |
| <40                | 119                  | 1.8%  | 26                 | 9.2%  | 12                  | 9.0%  | <5                | 0.3%  | <5                | 8.8%  | <5                      | 11.8% | 9                     | 18.0% |
| 40-49              | 792                  | 11.7% | 33                 | 11.7% | 15                  | 11.3% | 13                | 4.1%  | <5                | 8.8%  | <5                      | 11.8% | 11                    | 22.0% |
| 50-59              | 2203                 | 32.4% | 64                 | 22.6% | 35                  | 26.3% | 55                | 17.2% | 12                | 35.3% | <5                      | 11.8% | 15                    | 30.0% |
| 60-69              | 2006                 | 29.5% | 79                 | 27.9% | 39                  | 29.3% | 86                | 27.0% | 7                 | 20.6% | 5                       | 29.4% | 10                    | 20.0% |
| 70-79              | 1259                 | 18.5% | 58                 | 20.5% | 19                  | 14.3% | 80                | 25.1% | 5                 | 14.7% | 5                       | 29.4% | <5                    | 6.0%  |
| ≥80                | 412                  | 6.1%  | 23                 | 8.1%  | 13                  | 9.8%  | 84                | 26.3% | <5                | 11.8% | <5                      | 5.9%  | <5                    | 4.0%  |
| Stage at diagnosis |                      |       |                    |       |                     |       |                   |       |                   |       |                         |       |                       |       |
| Localized          | 3122                 | 46.0% | 137                | 48.4% | 57                  | 42.9% | 137               | 42.9% | 13                | 38.2% | 7                       | 41.2% | 35                    | 70.0% |
| Regional           | 1522                 | 22.4% | 57                 | 20.1% | 36                  | 27.1% | 80                | 25.1% | 7                 | 20.6% | <5                      | 17.6% | 5                     | 10.0% |
| Distant            | 1215                 | 17.9% | 54                 | 19.1% | 31                  | 23.3% | 66                | 20.7% | 6                 | 17.6% | <5                      | 23.5% | 8                     | 16.0% |
| Unspecified        | 932                  | 13.7% | 35                 | 12.4% | 9                   | 6.8%  | 36                | 11.3% | 8                 | 23.5% | <5                      | 17.6% | <5                    | 4.0%  |
| Foreign-born       | 5817                 |       | 3405               |       | 1875                |       | 552               |       | 1436              |       | 279                     |       | 2738                  |       |
| Sex                |                      |       |                    |       |                     |       |                   |       |                   |       |                         |       |                       |       |
| Male               | 3914                 | 67.3% | 2550               | 74.9% | 1369                | 73.0% | 158               | 28.6% | 986               | 68.7% | 202                     | 72.4% | 2121                  | 77.5% |
| Female             | 1903                 | 32.7% | 855                | 25.1% | 506                 | 27.0% | 394               | 71.4% | 450               | 31.3% | 77                      | 27.6% | 617                   | 22.5% |
| Age at diagnosis   |                      |       |                    |       |                     |       |                   |       |                   |       |                         |       |                       |       |
| <40                | 125                  | 2.1%  | 129                | 3.8%  | 59                  | 3.1%  | <5                | 0.2%  | 34                | 2.4%  | <5                      | 1.4%  | 105                   | 3.8%  |
| 40-49              | 505                  | 8.7%  | 314                | 9.2%  | 166                 | 8.9%  | 17                | 3.1%  | 167               | 11.6% | 11                      | 3.9%  | 254                   | 9.3%  |
| 50-59              | 1526                 | 26.2% | 647                | 19.0% | 356                 | 19.0% | 78                | 14.1% | 354               | 24.7% | 66                      | 23.7% | 683                   | 24.9% |
| 60-69              | 1656                 | 28.5% | 937                | 27.5% | 457                 | 24.4% | 192               | 34.8% | 439               | 30.6% | 93                      | 33.3% | 809                   | 29.5% |
| 70-79              | 1343                 | 23.1% | 928                | 27.3% | 538                 | 28.7% | 197               | 35.7% | 328               | 22.8% | 70                      | 25.1% | 662                   | 24.2% |
| ≥80                | 662                  | 11.4% | 450                | 13.2% | 299                 | 15.9% | 67                | 12.1% | 114               | 7.9%  | 35                      | 12.5% | 225                   | 8.2%  |
| Stage at diagnosis |                      |       |                    |       |                     |       |                   |       |                   |       |                         |       |                       |       |
| Localized          | 2503                 | 43.0% | 1442               | 42.3% | 771                 | 41.1% | 240               | 43.5% | 576               | 40.1% | 121                     | 43.4% | 1264                  | 46.2% |
| Regional           | 1375                 | 23.6% | 708                | 20.8% | 460                 | 24.5% | 107               | 19.4% | 317               | 22.1% | 69                      | 24.7% | 619                   | 22.6% |
| Distant            | 1086                 | 18.7% | 703                | 20.6% | 420                 | 22.4% | 114               | 20.7% | 275               | 19.2% | 58                      | 20.8% | 516                   | 18.8% |
| Unspecified        | 853                  | 14.7% | 552                | 16.2% | 224                 | 11.9% | 91                | 16.5% | 268               | 18.7% | 31                      | 11.1% | 339                   | 12.4% |
